# Supplementary material for: Genetic characterization of some Turkish sheep breeds based on the sequencing of the &lt;i&gt;Ovar-DRB1&lt;/i&gt; gene in the major histocompatibility complex (MHC) gene region
Source: Copernicus journal article supplement (doi:10.5194/aab-61-475-2018), 2018-12-06
Supplement: Supplementary file [file aab-61-475-2018-supplement-title-page.pdf › aab-61-475-2018-supplement-title-page.pdf]

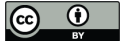

## *Supplement of*

# **Genetic characterization of some Turkish sheep breeds based on the sequencing of the *Ovar-DRB1* gene in the major histocompatibility complex (MHC) gene region**

**Fulya Özdil et al.**

*Correspondence to:* Fulya Özdil (fozdil@nku.edu.tr)

- aab-61-475-2018-supplement-title-page.pdf
- Supplement file.docx

The copyright of individual parts of the supplement might differ from the CC BY 4.0 License.
